# Supplementary material for: Inhibitory Effect of Osthole from Cnidium monnieri on Tobacco Mosaic Virus (TMV) Infection in Nicotiana glutinosa
Source: PubMed Central journal article supplement (PMC6982833; doi:10.3390/molecules25010065), 2019-12-24
Supplement: molecules-25-00065-s001.pdf [file molecules-25-00065-s001.pdf]

Article

# Inhibitory Effect of Osthole from *Cnidium monnieri* on Tobacco Mosaic Virus (TMV) Infection in *Nicotiana glutinosa*

Ya-Han Chen <sup>1,2</sup>, Dong-Sheng Guo <sup>2</sup>, Mei-Huan Lu <sup>2,3</sup>, Jian-Ying Yue <sup>1</sup>, Yan Liu <sup>4</sup>, Chun-Ming Shang <sup>4</sup>, De-Rong An <sup>2,\*</sup> and Ming-Min Zhao <sup>1,\*</sup>

<sup>1</sup> College of Horticulture and Plant Protection, Inner Mongolia Agricultural University, Hohhot 010019, China; yhchen1018@nwfau.edu.cn (Y.-H.C.); yuejianying2018@163.com (J.-Y.Y.)

<sup>2</sup> College of Plant Protection and State Key Laboratory of Crop Stress Biology for Arid Areas, Northwest A&F University, Yangling 712100, China; gds1995908@163.com (D.-S.G.); lu\_meihuan@sina.com (M.-H.L.)

<sup>3</sup> Microbial Resources of Research Center, Microbiology Institute of Shaanxi, Xi'an 710043, China

<sup>4</sup> Academy of Agriculture science in Baotou, Baotou 014010, China; liuyanww@126.com (Y.L.); chunmingsh@163.com (C.-M.S.)

\* Correspondence: anderong323@163.com (D.-R.A.); Mingminzh@163.com (M.-M.Z.); Tel.: +86-158-2909-7529 (D.-R.A.); +86-157-7136-0659 (M.-M.Z.); Fax: +86-029-8708-2710 (D.-R.A.); +86-0471-638-5801 (M.-M.Z.)

## Supplementary Materials

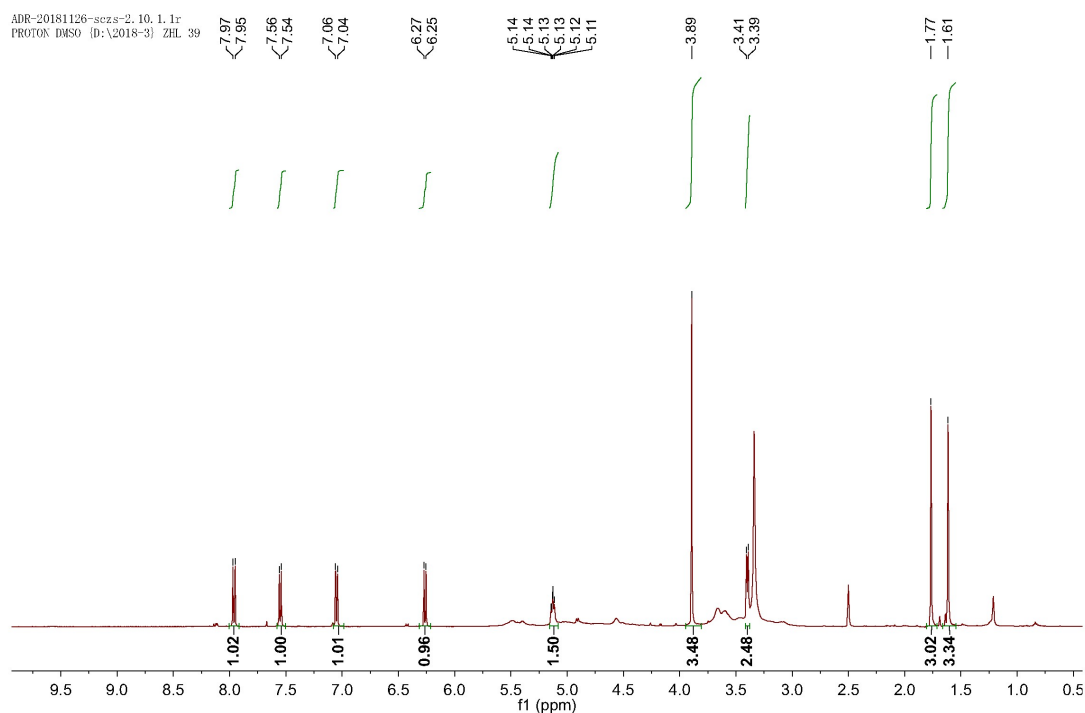

Figure S1. <sup>1</sup>H-NMR of osthole.

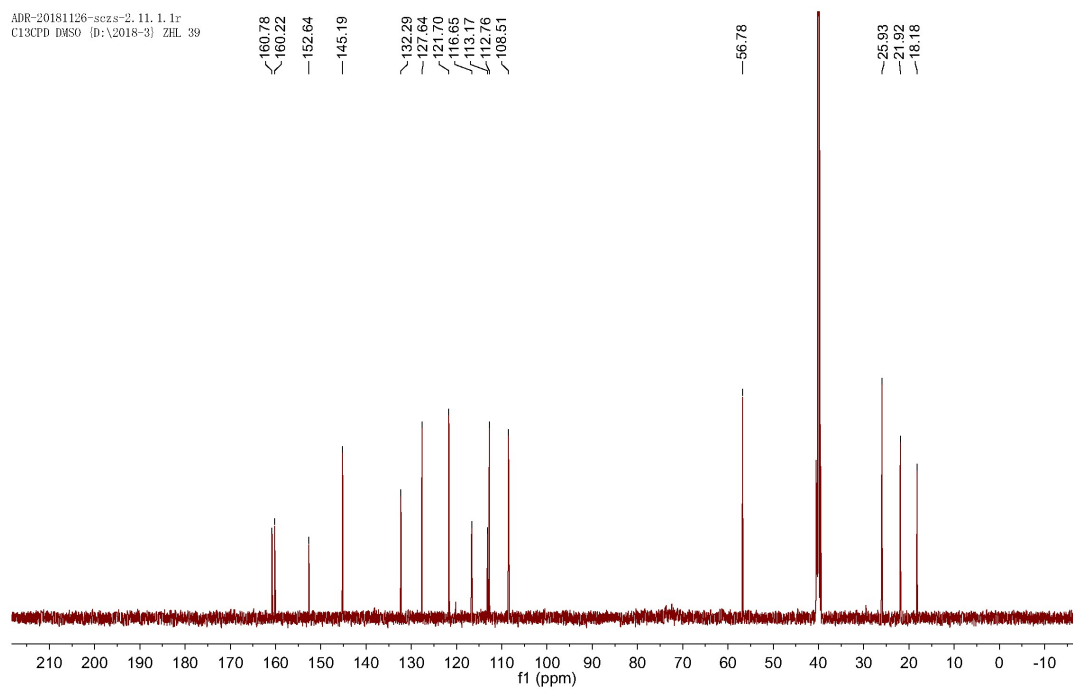

Figure S2. C-NMR of osthole.
